# **Atypical *Salmonella enterica* serovars in murine and human infection models: Is it time to reassess our approach to the study of salmonellosis?**

Daniel Hurley<sup>a,\*</sup>, Maria Hoffmann<sup>b</sup>, Tim Muruvanda<sup>b</sup>, Marc W. Allard<sup>b</sup>, Eric W. Brown<sup>b</sup>, Marta Martins<sup>a</sup> and Séamus Fanning<sup>a,\*</sup>

<sup>a</sup>UCD-Centre for Food Safety, School of Public Health, Physiotherapy and Sports Science, University College Dublin, Belfield, Dublin D04 N2E5, Ireland

<sup>b</sup>Center for Food Safety and Nutrition, Division of Microbiology, Office of Regulatory Science, U.S. Food and Drug Administration, College Park, Maryland 20740, USA

## **\*Corresponding authors:**

Daniel Hurley<sup>a</sup>, Email: [daniel.hurley@ucdconnect.ie](mailto:daniel.hurley@ucdconnect.ie)

Professor Séamus Fanning<sup>a</sup>, Email: [sfanning@ucd.ie](mailto:sfanning@ucd.ie), Fax: +35317161147, Phone: +35317162869

## Abstract

Nontyphoidal *Salmonella* species are globally disseminated pathogens and the predominant cause of gastroenteritis. The pathogenesis of salmonellosis has been extensively studied using *in vivo* murine models and cell lines typically challenged with *Salmonella* Typhimurium. Although serovars Enteritidis and Typhimurium are responsible for the most of human infections reported to the CDC, several other serovars also contribute to clinical cases of salmonellosis. Despite their epidemiological importance, little is known about their infection phenotypes. Here, we report the virulence characteristics and genomes of 10 atypical *S. enterica* serovars linked to multistate foodborne outbreaks in the United States. We show that the murine RAW 264.7 macrophage model of infection is unsuitable for inferring human relevant differences in nontyphoidal *Salmonella* infections whereas differentiated human THP-1 macrophages allowed these isolates to be further characterised in a more relevant, human context.

30 *Salmonella* is a zoonotic pathogen responsible for illnesses on a global scale and poses a  
 31 significant burden to public health<sup>1</sup>. Invasive salmonellae, such as the host-restricted  
 32 *Salmonella enterica* (*S. enterica*) serovars Typhi and Paratyphi cause fever in humans killing  
 33 nearly 217,000 people worldwide<sup>2</sup>. Infection with nontyphoidal *Salmonella* (NTS) such as *S.*  
 34 *enterica* serovars Enteritidis and Typhimurium results in bacteraemia and gastroenteritis and is  
 35 estimated to cause 155,000 deaths annually<sup>3</sup>.  
 36  
 37 *Salmonella* are non-fastidious bacteria that can survive outside the host in a range of food  
 38 matrices, low-moisture conditions as well as food processing environments. In humans,  
 39 infection commonly occurs following the ingestion of contaminated food or water. Sources for  
 40 contamination vary and can range from the presence of the bacterium on raw produce to the  
 41 shedding of *Salmonella* in the faecal and urinary excretions of reservoir animals<sup>4,5</sup>.  
 42  
 43 Upon entering the host, salmonellae are challenged by a series of adverse conditions including  
 44 the low pH environment of the stomach, the membrane disrupting properties of bile in the small  
 45 intestine and a battery of phagocytic host immune cells such as macrophages<sup>6,7</sup>. Deployment  
 46 of a Type III Secretion System (T3SS) apparatus is fundamental to the pathogenesis of  
 47 *Salmonella* and enables the bacterium to translocate effector proteins into the host cell  
 48 cytoplasm<sup>8</sup>. The acquisition of Salmonella Pathogenicity Island (SPI) encoded virulence factors  
 49 *via* horizontal gene transfer followed by evolution has enabled this microorganism to exploit a  
 50 privileged replicative niche, avoiding the host innate immune system within intracellular  
 51 vesicles called Salmonella-Containing Vacuole (SCV)<sup>9,10</sup>. The protection afforded by the SCV  
 52 allows *Salmonella* to thrive and sets in motion a cycle of infection whereby the bacterium can

proliferate and basolaterally reinfect epithelial cells as well as become engulfed by additional, localised phagocytic cells.

The importance of *Salmonella* in both clinical and public health settings has fuelled research into the virulence mechanisms and associated pathogenicity of this bacterium<sup>11,12</sup>. Many of these studies use *S. Typhimurium* infection in mice as a model for typhoid fever due to the similar pathology observed including intestinal and extraintestinal lesions that frequently occur in human hosts infected with typhoidal serovars<sup>13</sup>. The *in vitro* transcriptome of *S. Typhimurium* has been characterised extensively by sequencing-based methods<sup>14,15</sup>. Similarly, the *ex vivo* response of *S. Typhi* and *S. Typhimurium* during infection of macrophages has also been elucidated<sup>16–18</sup>.

Although *S. Typhimurium* infection of mice results in symptoms mimicking human typhoid fever, this serovar, along with *S. Enteritidis* is predominantly associated with gastroenteritis in humans. Despite the fact that over 2,610 serovars of *Salmonella* have been reported to date, few studies are available to describe the infection arising from other *S. enterica* serovars<sup>19–22</sup>.

In this study, 10 atypical *S. enterica* serovars cultured from multistate foodborne outbreaks in the U.S. were characterised both pheno- and genotypically. Differences in the nature of the infection process and the underlying virulence determinants were noted. We identified factors that further explain the ability of these atypical *S. enterica* serovars to cause foodborne outbreaks.

## Results

### *In vitro* characterisation of the isolates

To simulate the host-specified challenges ingested salmonellae encounter along the alimentary canal during infection in an *in vitro* laboratory environment, isolates (Table 1) were characterised for their acid tolerance and swim/swarm motility. In addition, differences in susceptibility to salts of the main acid constituents of bile were determined by Minimum Inhibitory Concentration (MIC) and Minimum Bactericidal Concentration (MBC) assays.

The acid tolerance response of *Salmonella* is a complex defence mechanism employed by the pathogen to defend against the acid shock experienced in the stomach<sup>6</sup>. Increased numbers for the majority of isolates were recorded following 1 and 2 hours of growth at pH 2.5 before significant reductions in viable numbers occurred at 4 hours (Supplementary Fig. S1). Motility has been suggested as a virulence determinant with respect to invasion with notable non-motile and/or host adapted exceptions<sup>23–26</sup>. After 24 hours of incubation at 21 °C, *S. Bareilly* CFSAN001111 and *S. Javiana* CFSAN000905 exhibited a reduced swim phenotype when compared to *S. Typhimurium* ST4/74 ( $P < 0.001$ ) whereas *S. Newport* CFSAN003345 and *S. Saintpaul* CFSAN004090 exhibited an increased swim phenotype ( $P < 0.001$ ). At 37 °C, *S. Anatum* CFSAN003959 and *S. Tennessee* CFSAN001387 exhibited a reduced swim phenotype after 8 and 24 hours when compared to *S. Typhimurium* ST4/74 ( $P < 0.001$ ) (Supplementary Fig. S2). In the absence of glucose as a carbon source, no swarm motility was observed for any of the isolates regardless of temperature or incubation time (Supplementary

Fig. S2). During digestion, contraction of the gall bladder releases bile into the small intestine. *Salmonella* Weltevreden CFSAN001415 showed a two-fold difference in susceptibility to sodium deoxycholate (DOC) in comparison to *S. Typhimurium* ST4/74 although the MBC was comparable to the other isolates (Supplementary Table S1).

# **Intracellular survival of atypical *S. enterica* serovars in murine and human macrophages**

*Salmonella* Typhimurium pathogenesis has been extensively studied *in vivo* using murine models and *ex vivo* using murine cell lines (such as J774.2 and RAW 264.7). However, the differences in the ability of *Salmonella* to survive and replicate within human macrophages is currently not well described<sup>27</sup>. Differentiated human monocyte cell lines (including THP-1 and U937) have been used to explore the replication of *S. enterica* serovars Enteritidis and Typhimurium. Few studies describing the bacterial replication in human macrophages of atypical NTS serovars have been reported despite their epidemiological importance and their contributions to clinical cases of salmonellosis<sup>27,28</sup>.

To study the ability of the isolates to survive phagocytosis, infections were performed using murine RAW 264.7 and differentiated human THP-1 macrophages by the gentamicin protection assay adapted from protocols previously described<sup>29–32</sup>. *Salmonella* Typhimurium 14028S and ST4/74 were included as reference strains in all infection assays. Infections were carried out at a Multiplicity Of Infection (MOI) of 10:1. Viable internalised bacteria were enumerated at 2, 4, 8 and 24 Hours Post Infection (HPI) in RAW 264.7 and 2, 4, 8, 24 and 168 HPI in THP-1 macrophages.

121 Of the 10 atypical serovars tested in this study, all isolates were found to persist within RAW  
122 264.7 macrophages for 24 HPI with many of these increasing in number over the course of the  
123 infection. In the case of *S. Weltevreden* CFSAN001415, a 1-Log<sub>10</sub> decrease in intracellular  
124 bacteria between 2 and 24 HPI was recorded though this isolate was still recoverable. In  
125 contrast, *S. Tennessee* CFSAN001387 exhibited a 1-Log<sub>10</sub> increase in intracellular bacteria  
126 between 2 and 24 HPI. Similar numbers of viable bacteria were recorded for *S. Typhimurium*  
127 14028S and ST4/74 (Fig. 1a).

128

129 The highest and lowest mean Colony Forming Units (CFU)/mL for all 10 atypical serovars are  
130 shown (Supplementary Table S2). When the Log<sub>2</sub> fold change was calculated, *S. Weltevreden*  
131 CFSAN001415 recorded the largest decrease at 8 and 24 HPI (Fig. 1b). Of note, *S. Bareilly*  
132 CFSAN001111 showed an unusual infection profile in that it had the highest mean CFU/mL at  
133 2 HPI, possibly indicative of increased invasiveness, despite normalisation of the infections by  
134 centrifuging the cell culture plates. The latter observation was maintained for all subsequent  
135 time points. However, the mean CFU/mL at 4, 8 and 24 HPI for *S. Bareilly* CFSAN001111  
136 were lower than other isolates.

137

138 When compared to *S. Typhimurium* ST4/74, significant differences were observed in the  
139 infection profile of specific isolates at individual time points (Supplementary Table S3). Time  
140 courses longer than 24 hours were not possible in RAW 264.7 as this resulted in cell death or  
141 proliferation of the macrophages themselves which would skew the MOI. Although differences  
142 between these isolates were observed in RAW 264.7 macrophages, the inability to consistently  
143 extend the time course of the assay beyond 24 HPI limited the utility of this *ex vivo* murine

144 model to discern any further differences in the ability of the isolates to survive and persist  
 145 following phagocytosis. To mitigate this limitation and differentiate the isolates in a human  
 146 relevant context, additional assays were carried out in differentiated THP-1 macrophages.  
 147  
 148 Of the 10 atypical serovars tested in this study, all persisted within THP-1 macrophages for 24  
 149 HPI with the majority exhibiting no significant changes in viable numbers up to this time point.  
 150 As with RAW 264.7 macrophages, the only exception noted when infecting THP-1  
 151 macrophages was recorded for *S. Weltevreden* CFSAN001415 which exhibited a 1-Log<sub>10</sub>  
 152 decrease in mean CFU/mL between 2 and 24 HPI but remained recoverable. Upon extending  
 153 this assay beyond 24 hours to 168 HPI, equivalent to 7 days, all serovars with the exception of  
 154 *S. Anatum* CFSAN003959 and both *S. Typhimurium* 14028S and ST4/74 reference strains  
 155 were recoverable with the majority exhibiting a 2-Log<sub>10</sub> decrease in intracellular bacteria.  
 156 Exceptions to this were noted for *S. Cubana* CFSAN002050, *S. Heidelberg* CFSAN002063  
 157 and *S. Tennessee* CFSAN001387 which showed a 1-Log<sub>10</sub> decrease in intracellular bacteria  
 158 between 2 and 168 HPI with *S. Tennessee* CFSAN001387 displaying the smallest decrease of  
 159 all isolates. Conversely, *S. Weltevreden* CFSAN001415 demonstrated the largest decrease in  
 160 bacterial cell numbers at 168 HPI but unlike *S. Anatum* CFSAN003959 and both *S.*  
 161 *Typhimurium* 14028S and ST4/74 reference strains, it could still be recovered at the end of the  
 162 assay (Fig. 1a).  
 163  
 164 The highest and lowest mean CFU/mL among the 10 study isolates are shown  
 165 (Supplementary Table S2). In THP-1 macrophages, *S. Weltevreden* CFSAN001415 had the  
 166 lowest mean CFU/mL at 24 and 168 HPI of the recoverable isolates as observed in the Log<sub>2</sub>



fold change (Fig. 1b). As observed in RAW 264.7 macrophages, *S. Tennessee* CFSAN001387 had the highest mean CFU/mL at 24 HPI as well as 168 HPI in THP-1 macrophages. When compared to *S. Typhimurium* ST4/74, significant differences were observed in the infection profiles of specific isolates at individual time points (Supplementary Table S2).

Fewer significant differences were observed between isolates when compared to *S. Typhimurium* ST4/74 infection in human THP-1 macrophages versus murine RAW 264.7 macrophages highlighting the potential unsuitability of the murine model for inferring human relevant differences between isolates in NTS infection. Overall, the viable intracellular bacteria recorded at later time points, including 24 HPI, was significantly higher in RAW 264.7 than THP-1. Bacterial cell numbers reached as high as  $1 \times 10^7$  mean CFU/mL in RAW 264.7 for some atypical serovars compared with values that did not exceed  $1 \times 10^5$  mean CFU/mL in THP-1 for all isolates. This 2-Log<sub>10</sub> difference supports our observations showing the inability of RAW 264.7 to clear infecting bacteria compared with THP-1 macrophages.

The viability of both murine and human macrophages following infection with each of the selected bacterial isolates was measured using colorimetric assays to measure extracellular Glucose 6-Phosphate (G6P) and Lactate DeHydrogenase (LDH) activities compared with uninfected control macrophages. No significant differences were observed in host cell viability following a MOI of 10:1 (Supplementary Fig. S4 and Supplementary Fig. S5). This is in agreement with recent studies that used flow cytometry based techniques to quantify apoptosis in macrophages infected with different *Salmonella* strains<sup>27,33</sup>.

190 As *S. Tennessee* CFSAN001387 was noted to be the most proliferative isolate in THP-1  
 191 macrophages, exhibiting the lowest reduction in viable intracellular bacteria between 2 and 168  
 192 HPI, further assays were performed to directly compare to *S. Typhimurium* ST4/74 with CFU  
 193 being enumerated at 2, 4, 8, 24, 48, 72, 96, 120, 144 and 168 HPI. This was done to  
 194 determine when *S. Typhimurium* ST4/74 was no longer recoverable compared with *S.*  
 195 *Tennessee* CFSAN001387. *Salmonella* Typhimurium ST4/74 exhibited an overall 1-Log<sub>10</sub>  
 196 reduction between 2 and 48 HPI with an additional 2-Log<sub>10</sub> reduction in viable bacteria by 72  
 197 hours. After 96 and 120 HPI, *S. Typhimurium* ST4/74 was barely detected and was  
 198 unrecoverable at 144 and 168 HPI. In comparison, *S. Tennessee* CFSAN001387 exhibited an  
 199 overall 1-Log<sub>10</sub> reduction between 2 and 168 HPI, similar to the previous infections (Fig. 1c).  
 200 Differences between these two isolates were significant at multiple individual time points  
 201 (Supplementary Table S4).

202

## 203 **Host response to atypical *S. enterica* infection by murine and human macrophages**

204

205 As there were notable differences exhibited by these *Salmonella* serovars in their ability to  
 206 replicate and survive within murine and human macrophages, the host response to infection  
 207 was investigated by quantifying proinflammatory cytokine and infection relevant chemokine  
 208 release using standard immunoassay protocols.

209

210 In RAW 264.7, increased CCL2 and CCL3 chemokine release was observed at 4, 8 and 24  
 211 HPI with *S. Tennessee* CFSAN001387 and *S. Weltevreden* CFSAN001415 when compared to  
 212 uninfected control macrophages. When comparing infection with these 10 atypical serovars

(Table 1) to *S. Typhimurium* ST4/74, increased proinflammatory cytokine (including IL6, IL10 and TNF) and chemokine (including CCL2, CCL3 and CXCL10) release was observed (Fig. 2) (Supplementary Table S5).

In THP-1, increased proinflammatory cytokine (including CXCL8, IL1B, IL6 and TNF), cytokine (including CSF2, IL1A, IL12B and VEGFA) and chemokine (including CCL2, CCL3, CCL4 and CXCL10) release was recorded at 8, 24 and 168 HPI across a selection of these isolates in comparison with uninfected control macrophages. As with RAW 264.7, when comparing infection with the 10 atypical serovars in this study to *S. Typhimurium* ST4/74 in THP-1, significant increased proinflammatory cytokine and chemokine release was observed, further differentiating the isolates by the innate host response (Fig. 3) (Supplementary Table S5).

*Salmonella* Heidelberg CFSAN002063 stimulated the release of CCL3, CSF2, CXCL8, CXCL10, IL1A, IL1B, IL6, IL12 and TNF to levels in excess of those observed for *S. Typhimurium* ST4/74, particularly at 8 HPI and from 4 to 168 HPI with respect to TNF (Supplementary Fig. S7). In the gentamicin protection assays it was noted that although both *S. Tennessee* CFSAN001387 and *S. Weltevreden* CFSAN001415 could be recovered at 168 HPI from THP-1 macrophages, these two isolates exhibited different infection profiles. The former displayed the smallest reduction in viable intracellular bacteria over the time course of the infection whereas the latter displayed the largest reduction in viable numbers. This can be accounted for in the overlapping yet contrasting cytokine profile of THP-1 macrophages following infection with these isolates. *Salmonella* Tennessee CFSAN001387 and *S. Weltevreden* CFSAN001415 stimulated the release of CCL3, CCL4, IL1A, IL6, IL12B and TNF

236 to levels in excess of those observed for *S. Typhimurium* ST4/74 (Fig. 4a, Fig. 4b and Fig. 4c).  
 237 In addition, *S. Weltevreden* CFSAN001415 stimulated the release of CCL2, CXCL10, CSF2  
 238 and IL1B triggering a broader response in comparison to that observed for *S. Tennessee*  
 239 CFSAN001387 (Fig. 4a, Fig. 4b and Fig. 4c).

240  
 241 Overall, the human macrophages mounted a much greater proinflammatory response to  
 242 infection in comparison to the murine model (Fig. 4c). A homolog of the human *CXCL8* gene is  
 243 absent in mice. However, the murine *Cxc1* gene codes for a functionally homologous  
 244 protein<sup>34</sup>. The latter was not released from infected RAW 264.7 to the levels observed for  
 245 CXCL8 in THP-1 in this study. As all infections were carried out in pure macrophage cultures,  
 246 the true effect of the observed chemokine release cannot be fully appreciated in this  
 247 experimental model as the activation and/or recruitment of other phagocytic cells in a coculture  
 248 population or an *in vivo* environment would have an impact on bacterial survival.

249  
 250 **Distribution and similarity of SPI proteins from atypical *S. enterica* serovars in**  
 251 **comparison to *S. Typhimurium* ST4/74**

252  
 253 Whole genome sequencing was used to facilitate a comparative analysis of all 10 atypical  
 254 serovars to elucidate the genetic variation among them with particular focus on virulence  
 255 determinants and SPI loci gene content<sup>35,36</sup>. Sequencing was performed using the Illumina  
 256 MiSeq and Pacific Biosciences RS II sequencing platforms. *De novo* assemblies were  
 257 performed on these data and the N50 length for Illumina sequenced assemblies ranged from  
 258 403 to 763 kbp with an average N50 length of 586 kbp (Supplementary Table S6). These

259 genome sequences were used to determine the relationships between the isolates to identify  
 260 key differences that may explain the phenotypes observed in the previous experiments.  
 261 Genetic diversity was characterised by amino acid sequence similarity that identified highly  
 262 conserved SPI regions between these isolates despite the broad range of serovars in addition  
 263 to distinct variable regions and/or absence of key effector proteins in specific isolates (Fig. 5  
 264 and Supplementary Fig. S8).

265

266 SPI-1 and its associated T3SS have been extensively implicated in *Salmonella* virulence and  
 267 the ability of this pathogen to invade host eukaryotic cells, trigger inflammation and transport  
 268 effector proteins<sup>37,38</sup>. Sequence variation at the amino acid level in comparison to *S.*  
 269 Typhimurium ST4/74 was greatest in AvrA, OrgB, SptP, SipD, InvB and SL2883 proteins.  
 270 Several SPI-1 encoded genes were absent in many of the atypical serovars but present in *S.*  
 271 Typhimurium ST4/74 though not yet fully characterised (Fig. 5).

272

273 The AvrA protein has been previously shown to be crucial, playing a role in the inhibition of the  
 274 antiapoptotic NF- $\kappa$ B pathway<sup>39</sup>. In *S. Typhimurium* 14028S, *S. Anatum* CFSAN003959, *S.*  
 275 Javiana CFSAN000905 and *S. Newport* CFSAN003345, AvrA showed differences at the  
 276 amino acid sequence level which may affect its ability to function as a protease<sup>40</sup>. SptP is a  
 277 tyrosine phosphatase involved in the inhibition Raf activation and the subsequent MAP kinase  
 278 pathway<sup>41</sup>. Its identification here is consistent with the phenotype observed for *S. Heidelberg*  
 279 CFSAN002063 that stimulated high levels of TNF release at 4, 8, 24 and 168 HPI in THP-1  
 280 macrophages. A number of proteins, including STM2901, STM2902, STM2903, SL2883,  
 281 STM2904 and STM2905 that are SPI-1 associated in *S. Typhimurium* ST4/74 showed mixed

conservation, either being highly similar in the majority of isolates or were unidentifiable in *S.*  
*Anatum* CFSAN003959, *S. Javiana* CFSAN000905 and *S. Newport* CFSAN003345.

SPI-2 and its associated T3SS contributes to the ability of *Salmonella* to translocate effectors  
across the membrane of the SCV when the bacterium is internalised in epithelial cells and  
macrophages<sup>42,43</sup>. The integral function of SPI-2 for intracellular survival can be observed by  
the degree of amino acid sequence conservation across all atypical serovars (Fig. 5). As these  
isolates were implicated in multistate foodborne outbreaks and, as demonstrated above,  
capable of surviving within both RAW 264.7 and THP-1 macrophages, this observation is  
consistent with the expressed phenotype and raises the question as to whether or not potential  
differences in the expression of some/all of these genes may further explain the differences  
shown in intracellular survival. Sequence variation at the amino acid level in comparison to *S.*  
*Typhimurium* ST4/74 was greatest in *SsaB*, *SseB*, *SseC* and *SseD*. Loss of the effector protein  
*SsaB* (*SpiC*) has been shown to promote defective virulence phenotypes due to an inability to  
translocate all SPI-2 effectors<sup>44</sup>. This may explain the observed infection phenotype in *S.*  
*Anatum* CFSAN003959, the only isolate among the 10 atypical serovars studied to be  
unrecoverable at 168 HPI in THP-1 macrophages, as it had the lowest amino acid sequence  
similarity for *SsaB*.

*SseBCD* proteins function as a translocon that facilitate the secretion of effector proteins by  
intracellular *Salmonella*<sup>45</sup>. Both *S. Cubana* CFSAN002050 and *S. Tennessee* CFSAN001387  
display differences in all three *SseBCD* proteins with *S. Tennessee* CFSAN001387 being least  
similar at the amino acid sequence level when compared to *S. Typhimurium* ST4/74.

305 *Salmonella* Tennessee CFSAN001387 was shown in this study to survive within THP-1  
306 macrophages significantly better in comparison to *S. Typhimurium* ST4/74.  
307  
308 High levels of similarity to *S. Typhimurium* ST4/74 were observed for SPI-3 across the isolates  
309 with the exception of the complete loss or major differences in STM3752, SugR and RhuM as  
310 reported previously<sup>35</sup>. SPI-4 and its associated Type I Secretion System (T1SS) have been  
311 implicated in adhesion, contributing to intestinal inflammation in animal models<sup>46,47</sup>. *Salmonella*  
312 Newport CFSAN003345 and *S. Weltevreden* CFSAN001415 exhibited low levels of amino acid  
313 sequence similarity to *S. Typhimurium* ST4/74 with respect to SiiE which has been shown to  
314 be important for persistent infection in macrophages<sup>48</sup>. SPI-5 encodes many SPI-1 and SPI-2  
315 T3SS targeted effector proteins. Sequence variation was observed for CopR, PipA, STM1089,  
316 STM1093 in multiple isolates with mutations in PipA having previously been implicated in  
317 enteric salmonellosis<sup>49</sup>.

## Discussion

Studies aimed at elucidating the host response to NTS serovars including Enteritidis and Typhimurium have been facilitated by the availability of murine infection models. This study focussed on atypical serovars of this genus availing of isolates cultured from foodborne outbreaks, the majority of which are frequently listed in the top 20 serovars responsible for laboratory-confirmed human cases of salmonellosis as reported annually by the CDC<sup>50</sup>. These data identify key differences between isolates related to their ability to survive within macrophages and highlight the potential unsuitability of the widely used murine macrophage model to infer human relevant distinctions between isolates. We have shown that for NTS serovars, distinct differences in the inflammatory response of human macrophages can further differentiate these microorganisms in a manner that was not possible with murine macrophages (Fig. 3). Furthermore, the reference strains *S. Typhimurium* 14028S and ST4/74 that are often included in *in vitro* research emerged as the biological outliers in many respects with regards to their infection phenotype (Fig. 1). In the case of specific proinflammatory cytokines such as TNF, RAW 264.7 macrophages responded to infection with *S. Typhimurium* 14028S and ST4/74, *S. Tennessee* CFSAN001387 and *S. Weltevreden* CFSAN001415 whereas THP-1 macrophages displayed a broader proinflammatory response to the range of serovars studied (Fig. 4).

These data suggest more differences than previously acknowledged for *S. enterica* serovars with implications for public health. In agreement with this notion, key differences were identified in established virulence determinants of *Salmonella* such as SPI gene content bridging the gap



341 between the observed phenotypes and the underlying genotypes. Further work will be required  
342 to understand the full scope of other potential targets within the genomes of these isolates  
343 such as the accessory gene content unique to individual strains, many of which are currently  
344 poorly characterised.

## Methods

### Bacterial isolates and culture methods

Environmental and food isolates were collected from different countries between 2005 and 2012 by the U.S. Food and Drug Administration inspections as part of compliance actions<sup>51</sup>. The clinical isolate was obtained from the Washington State Department of Health (Table 1). All *Salmonella* isolates were stored at -80 °C in Lysogeny Broth (LB) broth (Sigma-Aldrich) supplemented with 15 % [v/v] glycerol. Working cultures were prepared by streaking isolates and restreaking individual colonies onto Mueller-Hinton (MH) agar (Sigma-Aldrich). Individual colonies from restreaked isolates were used to inoculate 5 mL MH broth (Sigma-Aldrich) and grown overnight at 37 °C with orbital shaking at 200 RPM. Overnight cultures were then used in the subsequent experiments as detailed below.

### Acid resistance

The ability to survive in a low pH culture medium was assessed for all isolates as described previously<sup>52</sup>. Briefly, bacterial cultures were individually grown overnight (18 hours) without shaking in 5 mL buffered MH broth (MES hydrate, 2 % [w/v], pH 5) containing 0.4 % [w/v] glucose at 37 °C. A volume of 333 µL of overnight culture was centrifuged at 10,000 RPM for 10 minutes. The supernatant was removed and the cell pellet recovered and resuspended in 2 mL prewarmed, buffered MH broth (MES hydrate, 2 % [w/v], pH 2.5) containing 0.4 % [w/v]

glucose and incubated at 37 °C in a 24 well plate. Time points were taken at 0 hours (before acidification), 1, 2 and 4 hours post-acidification. At each time point, 10 µL of the culture was diluted in 1,990 µL of maximum recovery diluent (MRD) medium (Oxoid) in a fresh 24 well plate and incubated for 30 minutes at room temperature to allow the bacteria to recover. Samples were then decimally diluted in phosphate buffered saline (PBS) (Sigma-Aldrich) and 100 µL aliquots of these dilutions were plated directly onto LB agar. Agar plates were incubated for 18 hours at 37 °C before enumeration of the CFU.

375

### 376 **Motility assays**

377

Swim and swarm motility was assessed for all isolates as described previously<sup>52</sup>. Briefly, swim motility plates (MH broth containing 0.3 % [w/v] agar) were stab inoculated. Swarm motility plates (MH broth containing 0.6 % [w/v] agar) were inoculated by spotting 1 µL of overnight culture. Inoculated plates were then incubated at 21 °C (ambient room temperature) for 8 and 24 hours and 37 °C for 8 hours. The diameter of visible colony spread was measured in mm from three directions and the average value recorded.

384

### 385 **Tolerance to bile salts**

386

The MIC and MBC for sodium deoxycholate (DOC) and sodium cholate was determined for all isolates using the broth dilution method according to Clinical and Laboratory Standard Institute (CLSI) guidelines adapted from the protocol as described previously<sup>53</sup>.

390

## 391 **Bacterial growth curves**

392

393 The growth of all isolates in LB broth was assessed using a Multiskan FC microplate  
394 photometer (Thermo Fisher Scientific) (Supplementary Fig. S3). Measurements were taken  
395 every 15 minutes over 24 hours at OD<sub>620</sub> nm. The instrument was kept at 37 °C with shaking  
396 during kinetic intervals.

397

## 398 **Preparation of bacterial inoculum for infection**

399

400 The MIC and MBC for gentamicin (CN) was determined for all isolates using the broth dilution  
401 method according to CLSI guidelines. Susceptibility or resistance was classified according to  
402 the lower working concentration of 20 µg/mL used in the gentamicin protection assays as  
403 detailed below.

404

405 Inoculum stocks for each isolate were prepared by streaking and restreaking individual  
406 bacterial isolates onto LB agar. Individual colonies from restreaked isolates were taken and  
407 used to inoculate 5 mL LB broth before growth overnight at 37 °C with orbital shaking at 200  
408 RPM. Overnight cultures were centrifuged at 5,500 RCF for 10 minutes. The supernatant was  
409 discarded and the bacterial cell pellet resuspended in 5 mL PBS before centrifugation again at  
410 5,500 RCF for 10 minutes. Finally, the pellet was resuspended in 5 mL of PBS (15 % [v/v]  
411 glycerol) solution before aliquoting (250 µL/microcentrifuge tube) and freezing at -80 °C.  
412 Representative inoculum stocks for each isolate were decimally diluted in PBS and 100 µL

413 aliquots of the dilutions were plated onto LB agar. Agar plates were incubated for 18 hours at  
414 37 °C before enumeration of the CFU.

415

# 416 ***Ex vivo* gentamicin protection assay**

417

418 The ability to survive and proliferate following phagocytosis by murine RAW 264.7 and human  
419 THP-1 macrophages was assessed for all gentamicin susceptible isolates using S.  
420 Typhimurium 14028S and ST4/74 as reference strains adapted from protocols as described  
421 previously<sup>30,54</sup>.

422

423 RAW 264.7 macrophages were grown in antibiotic-free Dulbecco's Modified Eagle's Medium  
424 (DMEM) (Sigma-Aldrich) supplemented with 10 % [v/v] heat inactivated foetal bovine serum  
425 (FBS) and incubated at 37 °C in a humidified atmosphere with 5 % CO<sub>2</sub>. THP-1 monocytes  
426 were grown in antibiotic-free RPMI 1640 media (Sigma-Aldrich) supplemented with 10 % [v/v]  
427 heat inactivated FBS and incubated at 37 °C in a humidified atmosphere with 5% CO<sub>2</sub>. Cell  
428 viability was assessed using trypan blue and a Bio-Rad TC20 automated cell counter.

429

430 Cells were subcultured and 1 mL was directly seeded into 24 well plates at a density of 1 x 10<sup>5</sup>  
431 cells/mL per well. THP-1 monocytes were differentiated to adherent macrophages by  
432 supplementing media with 20 ng/mL phorbol 12-myristate 13-acetate (PMA) for 5 days.

433

434 Prior to infection, inoculum stocks for each bacterial isolate to be assessed were diluted in  
435 complete media to 1 x 10<sup>6</sup> bacteria/mL for a MOI of 10:1 and incubated at 37 °C for 1 hour.

436 Macrophages were washed 3 times with 1 mL Hank's Balanced Salt Solution (HBSS) before 1  
437 mL of the bacterial suspension prepared as outlined above, was added to each well with 1 mL  
438 of complete media being added to uninfected control wells. These 24 well plates were  
439 centrifuged at 300 RCF for 5 minutes at room temperature (21 °C) before incubation at 37 °C  
440 with 5 % CO<sub>2</sub> for 1 hour to allow for phagocytosis.

441

442 Following phagocytosis, the cells were washed 3 times with 1 mL HBSS. A volume of 1 mL  
443 complete media supplemented with 100 µg/mL gentamicin was added to each well before  
444 incubation at 37 °C with 5% CO<sub>2</sub> for 1 hour to kill external bacteria. After 1 hour, cells were  
445 washed 3 times with 1 mL HBSS. Another volume of 1 mL of complete media supplemented  
446 with 20 µg/mL gentamicin was then added to each well before incubation at 37 °C with 5 %  
447 CO<sub>2</sub> for the desired time points.

448

449 Time points were processed by washing the cells 3 times with 1 mL HBSS before 1 mL 1 %  
450 [v/v] Triton X-100 PBS solution was added to the infected cells prior to incubation at room  
451 temperature for 10 minutes. Lysed supernatants were decimally diluted in PBS and 100 µL  
452 aliquots of the dilutions were plated onto LB agar. Agar plates were incubated for 18 hours at  
453 37 °C before enumeration of the CFU.

454

455

456

457

## **Relative viability assay for RAW 264.7 and THP-1 by glucose-6-phosphate dehydrogenase and lactate dehydrogenase**

Relative viability of infected macrophages was determined by comparison to uninfected control cells using the Vybrant Cytotoxicity Assay kit (Life Technologies) and Pierce LDH Cytotoxicity Assay kit (Life Technologies) to measure extracellular glucose-6-phosphate dehydrogenase (G6PD) [EC 1.1.1.49] and lactate dehydrogenase (LDH) [EC 1.1.1.27] activity in cell culture supernatants according to manufacturer's instructions. All samples and standards were assayed in duplicate.

## **Cytokine quantification**

A panel of proinflammatory cytokines and infection relevant chemokines were quantified from the supernatants of infected RAW 264.7 and THP-1 macrophages (Supplementary Table 10). For RAW 264.7 supernatants, targets were quantified at 0 hours (before infection) and 1, 2, 4, 8 and 24 HPI. For THP-1 supernatants, targets were quantified at 0 hours (before infection) and 1, 2, 4, 8, 24 and 168 HPI.

RAW 264.7 cytokine/chemokine release was measured using a multiplex magnetic bead based kit (Life Technologies) and the Luminex 200 xMAP platform (Luminex). Similarly, THP-1 cytokine/chemokine release was measured using an electrochemiluminescence based V-PLEX kit (Meso Scale Discovery) and the Sector Imager 2400 platform (Meso Scale Discovery). The measured levels of many targets were below the range of detection in RAW

264.7 supernatant samples and for the purposes of this study were recorded at the lower level of detection for the assay used when comparing to *S. Typhimurium* ST4/74 infection or infected THP-1 macrophages. Assays were performed according to the manufacturer's protocol for cell culture supernatant samples. All samples and standards were assayed in duplicate.

486

### 487 **Bacterial whole genome sequencing**

488

Whole genome sequencing was carried out as described previously<sup>55</sup>. Briefly, genomic DNA (gDNA) was purified from overnight cultures of bacterial isolates grown in Trypticase Soy Broth (TSB) (Becton Dickinson) incubated at 37 °C using the DNeasy blood and tissue kit (Qiagen). Libraries were prepared using 1 ng gDNA with the Nextera XT kit (Illumina) and sequenced using the MiSeq platform (Illumina) with a V2 kit (2 x 250 bp).

494

Three isolates, namely *S. Cubana* CFSAN002050, *S. Tennessee* CFSAN001387 and *S. Weltevreden* CFSAN001415 were further sequenced using the Pacific Biosciences (PacBio) RS II platform. *Salmonella* *Cubana* CFSAN002050 was sequenced as described previously<sup>56,57</sup>. For *S. Tennessee* CFSAN001387 and *S. Weltevreden* CFSAN001415, libraries using 6 µg gDNA were sheared to a size of 10 kb using g-TUBEs (Covaris Inc., Woburn, MA) according to the manufacturer's instructions. The SMRTbell 10-kb template libraries were constructed using DNA Template Prep Kit 1.0 with the 10-kb insert library protocol (Pacific Biosciences, Menlo Park, CA, USA) and sequenced using the P4-C2 chemistry on 3 single-molecule real-time (SMRT) cells with a 240-minute collection protocol along with Stage Start.



## 504 **Whole genome assembly and annotation**

505

506 For Illumina MiSeq data, Jellyfish (version 2.2.6) was used to generate a *k*-mer spectrum  
 507 before inspecting the quality of the reads using FastQC (version 0.11.5)<sup>58,59</sup>. Error correction  
 508 was performed using BFC (version r181)<sup>60</sup>. A relaxed sliding window trim for an average Phred  
 509 quality score of 10 was performed using Trimmomatic (version 0.36) before the genomes were  
 510 *de novo* assembled with SPAdes (version 3.7.1) using the default *k*-mer size selection for 250  
 511 bp reads and the automatic coverage cutoff threshold<sup>61,62</sup>. The quality of the subsequent  
 512 assemblies was assessed using Bandage (version 0.8.0) and QUAST (version 4.1)<sup>63,64</sup>.  
 513 Contigs were excluded from the assembly if they were shorter than 200 bp.

514

515 Analysis of the PacBio data was implemented using SMRT Analysis 2.3.0. The best *de novo*  
 516 assembly was established with PacBio Hierarchical Genome Assembly Process (HGAP 3.0)  
 517 program using the continuous-long-reads from the three SMRT cells. The assembly outputs  
 518 from HGAP produced circular contiguous sequences with overlapping regions at the end that  
 519 can be identified using dot plots in Gepard (version 1.40)<sup>65</sup>. Genomes were checked manually  
 520 for even sequencing coverage. Afterwards the interim consensus sequence was used to  
 521 determine the final consensus and accuracy scores using Quiver consensus algorithm<sup>66</sup>.

522

523 All sequences and assemblies are publicly available with accession numbers provided (Table  
 524 1) and are submitted for annotation using the NCBI Prokaryotic Genome Automatic Annotation  
 525 Pipeline (PGAAP)<sup>67</sup>.

526

## 527 **Sequence analysis**

528

529 *Salmonella* Pathogenicity Island (SPI) gene content was compared to *S. Typhimurium* ST4/74  
530 for all isolates (Fig. 5 and Supplementary Fig. S8). Homologous amino acid sequences for  
531 each protein were identified and generated using BLAST+ (version 2.3.0) and Biopython  
532 (version 1.66)<sup>68–70</sup>. Amino acid sequence similarity was assessed using a Needleman-Wunsch  
533 global alignment through the EMBOSS analysis software (version 6.6.0)<sup>71</sup>.

534

## 535 **Pan-genome analysis**

536

537 To limit bias among different annotation tools for downstream analyses, additional annotation  
538 of all isolates included in this study was performed using Prokka (version 1.11)<sup>72–79</sup>. Presence  
539 or absence of protein sequences from all strains was determined using the pan-genome  
540 pipeline Roary (version 3.6.1) (Supplementary Fig. S9b and Supplementary Fig. S9c)<sup>80–83</sup>.  
541 Visualisation of the pan-genome data was performed using Anvi'o (version 1.2.3)  
542 (Supplementary Fig. S9a)<sup>84,85</sup>.

543

## 544 **Statistics**

545

546 The R statistical computing environment was used for all statistical analyses<sup>86,87</sup>. Multiple  
547 comparisons for normally distributed data were performed by one-way ANOVA where  
548 appropriate and *post hoc* analysis of significance was inspected by Tukey's range test.

549

550 **Code availability**

551

552 Data and code to reproduce the analyses and manuscript figures are available<sup>88</sup>.

## 553 References

554

- 555 1. Kirk, M. D. *et al.* World Health Organization Estimates of the Global and Regional  
556 Disease Burden of 22 Foodborne Bacterial, Protozoal, and Viral Diseases, 2010: A Data  
557 Synthesis. *PLoS Med* **12**, e1001921 (2015).
- 558 2. Crump, J. A., Luby, S. P. & Mintz, E. D. The global burden of typhoid fever. *Bull. World*  
559 *Health Organ.* **82**, 346–353 (2004).
- 560 3. Majowicz, S. E. *et al.* The Global Burden of Nontyphoidal Salmonella Gastroenteritis.  
561 *Clin. Infect. Dis.* **50**, 882–889 (2010).
- 562 4. Bäumler, A. J., Tsois, R. M., Ficht, T. A. & Adams, L. G. Evolution of Host Adaptation  
563 in *Salmonella enterica*. *Infect. Immun.* **66**, 4579–4587 (1998).
- 564 5. Barton Behravesh, C. *et al.* 2008 outbreak of *Salmonella* Saintpaul infections  
565 associated with raw produce. *N. Engl. J. Med.* **364**, 918–927 (2011).
- 566 6. Riesenber-Wilmes, M. R., Bearson, B., Foster, J. W. & Curtis, R. Role of the acid  
567 tolerance response in virulence of *Salmonella typhimurium*. *Infect. Immun.* **64**, 1085–1092  
568 (1996).
- 569 7. Prouty, A. M., Brodsky, I. E., Falkow, S. & Gunn, J. S. Bile-salt-mediated induction of  
570 antimicrobial and bile resistance in *Salmonella typhimurium*. *Microbiol. Read. Engl.* **150**, 775–  
571 783 (2004).
- 572 8. Haraga, A., Ohlson, M. B. & Miller, S. I. Salmonellae interplay with host cells. *Nat. Rev.*  
573 *Microbiol.* **6**, 53–66 (2008).
- 574 9. Juhas, M. *et al.* Genomic islands: tools of bacterial horizontal gene transfer and  
575 evolution. *Fems Microbiol. Rev.* **33**, 376–393 (2009).

- 576 10. Steele-Mortimer, O. The Salmonella-containing Vacuole – Moving with the Times. *Curr.*  
577 *Opin. Microbiol.* **11**, 38–45 (2008).
- 578 11. Coburn, B., Grassl, G. A. & Finlay, B. B. Salmonella, the host and disease: a brief  
579 review. *Immunol. Cell Biol.* **85**, 112–118 (2006).
- 580 12. Hurley, D., McCusker, M. P., Fanning, S. & Martins, M. Salmonella–host interactions –  
581 modulation of the host innate immune system. *Microb. Immunol.* **5**, 481 (2014).
- 582 13. Zhang, S. *et al.* Molecular Pathogenesis of Salmonella enterica Serotype Typhimurium-  
583 Induced Diarrhea. *Infect. Immun.* **71**, 1–12 (2003).
- 584 14. Kröger, C. *et al.* The transcriptional landscape and small RNAs of Salmonella enterica  
585 serovar Typhimurium. *Proc. Natl. Acad. Sci.* **109**, E1277–E1286 (2012).
- 586 15. Kröger, C. *et al.* An Infection-Relevant Transcriptomic Compendium for Salmonella  
587 enterica Serovar Typhimurium. *Cell Host Microbe* **14**, 683–695 (2013).
- 588 16. Sabbagh, S. C., Lepage, C., McClelland, M. & Daigle, F. Selection of Salmonella  
589 enterica Serovar Typhi Genes Involved during Interaction with Human Macrophages by  
590 Screening of a Transposon Mutant Library. *PLoS ONE* **7**, e36643 (2012).
- 591 17. Srikumar, S. *et al.* RNA-seq Brings New Insights to the Intra-Macrophage  
592 Transcriptome of Salmonella Typhimurium. *PLoS Pathog* **11**, e1005262 (2015).
- 593 18. Westermann, A. J. *et al.* Dual RNA-seq unveils noncoding RNA functions in host–  
594 pathogen interactions. *Nature* **529**, 496–501 (2016).
- 595 19. Olsen, S. J. *et al.* The Changing Epidemiology of Salmonella: Trends in Serotypes  
596 Isolated from Humans in the United States, 1987–1997. *J. Infect. Dis.* **183**, 753–761 (2001).
- 597 20. Guibourdenche, M. *et al.* Supplement 2003–2007 (No. 47) to the White-Kauffmann-Le  
598 Minor scheme. *Res. Microbiol.* **161**, 26–29 (2010).

- 599 21. Achtman, M. *et al.* Multilocus Sequence Typing as a Replacement for Serotyping in  
600 *Salmonella enterica*. *PLoS Pathog* **8**, e1002776 (2012).
- 601 22. Makendi, C. *et al.* A Phylogenetic and Phenotypic Analysis of *Salmonella enterica*  
602 Serovar Weltevreden, an Emerging Agent of Diarrheal Disease in Tropical Regions. *PLoS*  
603 *Negl Trop Dis* **10**, 1–19 (2016).
- 604 23. Lockman, H. A. & Curtiss, R. *Salmonella typhimurium* mutants lacking flagella or motility  
605 remain virulent in BALB/c mice. *Infect. Immun.* **58**, 137–143 (1990).
- 606 24. Li, J. *et al.* Evolutionary origin and radiation of the avian-adapted non-motile  
607 salmonellae. *J. Med. Microbiol.* **38**, 129–139 (1993).
- 608 25. Toguchi, A., Siano, M., Burkart, M. & Harshey, R. M. Genetics of Swarming Motility in  
609 *Salmonella enterica* Serovar Typhimurium: Critical Role for Lipopolysaccharide. *J. Bacteriol.*  
610 **182**, 6308–6321 (2000).
- 611 26. Harshey, R. M. Bacterial Motility on a Surface: Many Ways to a Common Goal. *Annu.*  
612 *Rev. Microbiol.* **57**, 249–273 (2003).
- 613 27. Lathrop, S. K. *et al.* Replication of *Salmonella Typhimurium* in Human Monocyte-  
614 Derived Macrophages. *Infect. Immun.* IAI.00033-15 (2015). doi:10.1128/IAI.00033-15
- 615 28. Schwan, W. R., Huang, X.-Z., Hu, L. & Kopecko, D. J. Differential Bacterial Survival,  
616 Replication, and Apoptosis-Inducing Ability of *Salmonella* Serovars within Human and Murine  
617 Macrophages. *Infect. Immun.* **68**, 1005–1013 (2000).
- 618 29. Vaudaux, P. & Waldvogel, F. A. Gentamicin antibacterial activity in the presence of  
619 human polymorphonuclear leukocytes. *Antimicrob. Agents Chemother.* **16**, 743–749 (1979).

- 620 30. Steele-Mortimer, O., Méresse, S., Gorvel, J.-P., Toh, B.-H. & Finlay, B. B. Biogenesis of  
621 *Salmonella typhimurium*-containing vacuoles in epithelial cells involves interactions with the  
622 early endocytic pathway. *Cell. Microbiol.* **1**, 33–49 (1999).
- 623 31. Steele-Mortimer, O. *et al.* The invasion-associated type III secretion system of  
624 *Salmonella enterica* serovar Typhimurium is necessary for intracellular proliferation and  
625 vacuole biogenesis in epithelial cells. *Cell. Microbiol.* **4**, 43–54 (2002).
- 626 32. Malik-Kale, P., Winfree, S. & Steele-Mortimer, O. The Bimodal Lifestyle of Intracellular  
627 *Salmonella* in Epithelial Cells: Replication in the Cytosol Obscures Defects in Vacuolar  
628 Replication. *PLoS ONE* **7**, e38732 (2012).
- 629 33. Braukmann, M., Methner, U. & Berndt, A. Immune Reaction and Survivability of  
630 *Salmonella Typhimurium* and *Salmonella Infantis* after Infection of Primary Avian  
631 Macrophages. *PLoS ONE* **10**, e0122540 (2015).
- 632 34. Modi, W. S. & Yoshimura, T. Isolation of novel GRO genes and a phylogenetic analysis  
633 of the CXC chemokine subfamily in mammals. *Mol. Biol. Evol.* **16**, 180–193 (1999).
- 634 35. McWhorter, A. R. & Chousalkar, K. K. Comparative phenotypic and genotypic virulence  
635 of *Salmonella* strains isolated from Australian layer farms. *Food Microbiol.* **6**, 12 (2015).
- 636 36. Dhanani, A. S. *et al.* Genomic Comparison of Non-Typhoidal *Salmonella enterica*  
637 Serovars Typhimurium, Enteritidis, Heidelberg, Hadar and Kentucky Isolates from Broiler  
638 Chickens. *PLoS ONE* **10**, e0128773 (2015).
- 639 37. Ehrbar, K., Friebel, A., Miller, S. I. & Hardt, W.-D. Role of the *Salmonella* Pathogenicity  
640 Island 1 (SPI-1) Protein InvB in Type III Secretion of SopE and SopE2, Two *Salmonella*  
641 Effector Proteins Encoded Outside of SPI-1. *J. Bacteriol.* **185**, 6950–6967 (2003).

- 642 38. Hapfelmeier, S. *et al.* The Salmonella pathogenicity island (SPI)-2 and SPI-1 type III  
643 secretion systems allow Salmonella serovar typhimurium to trigger colitis via MyD88-  
644 dependent and MyD88-independent mechanisms. *J. Immunol. Baltim. Md 1950* **174**, 1675–  
645 1685 (2005).
- 646 39. Collier-Hyams, L. S. *et al.* Cutting Edge: Salmonella AvrA Effector Inhibits the Key  
647 Proinflammatory, Anti-Apoptotic NF-κB Pathway. *J. Immunol.* **169**, 2846–2850 (2002).
- 648 40. Liao, A. P. *et al.* Salmonella Type III Effector AvrA Stabilizes Cell Tight Junctions to  
649 Inhibit Inflammation in Intestinal Epithelial Cells. *PLoS ONE* **3**, e2369 (2008).
- 650 41. Lin, S. L., Le, T. X. & Cowen, D. S. SptP, a Salmonella typhimurium type III-secreted  
651 protein, inhibits the mitogen-activated protein kinase pathway by inhibiting Raf activation. *Cell.*  
652 *Microbiol.* **5**, 267–275 (2003).
- 653 42. Waterman, S. R. & Holden, D. W. Functions and effectors of the Salmonella  
654 pathogenicity island 2 type III secretion system. *Cell. Microbiol.* **5**, 501–511 (2003).
- 655 43. Figueira, R. & Holden, D. W. Functions of the Salmonella pathogenicity island 2 (SPI-2)  
656 type III secretion system effectors. *Microbiol. Read. Engl.* **158**, 1147–1161 (2012).
- 657 44. Freeman, J. A., Rappl, C., Kuhle, V., Hensel, M. & Miller, S. I. SpiC Is Required for  
658 Translocation of Salmonella Pathogenicity Island 2 Effectors and Secretion of Translocon  
659 Proteins SseB and SseC. *J. Bacteriol.* **184**, 4971–4980 (2002).
- 660 45. Nikolaus, T. *et al.* SseBCD Proteins Are Secreted by the Type III Secretion System of  
661 Salmonella Pathogenicity Island 2 and Function as a Translocon. *J. Bacteriol.* **183**, 6036–6045  
662 (2001).
- 663 46. Gerlach, R. G. *et al.* Salmonella Pathogenicity Island 4 encodes a giant non-fimbrial  
664 adhesin and the cognate type 1 secretion system. *Cell. Microbiol.* **9**, 1834–1850 (2007).



- 665 47. Gerlach, R. G., Jäckel, D., Geymeier, N. & Hensel, M. Salmonella Pathogenicity Island  
666 4-Mediated Adhesion Is Coregulated with Invasion Genes in Salmonella enterica. *Infect.*  
667 *Immun.* **75**, 4697–4709 (2007).
- 668 48. Morgan, E., Bowen, A. J., Carnell, S. C., Wallis, T. S. & Stevens, M. P. SiiE Is Secreted  
669 by the Salmonella enterica Serovar Typhimurium Pathogenicity Island 4-Encoded Secretion  
670 System and Contributes to Intestinal Colonization in Cattle. *Infect. Immun.* **75**, 1524–1533  
671 (2007).
- 672 49. Wood, M. W. *et al.* Identification of a pathogenicity island required for Salmonella  
673 enteropathogenicity. *Mol. Microbiol.* **29**, 883–891 (1998).
- 674 50. National Salmonella Surveillance | National Surveillance | CDC. Available at:  
675 <http://www.cdc.gov/nationalsurveillance/salmonella-surveillance.html>.
- 676 51. Allard, M. W. *et al.* the PRACTICAL value of Food Pathogen Traceability through  
677 BUILDING a Whole-Genome Sequencing Network and database. *J. Clin. Microbiol.* (2016).  
678 doi:10.1128/JCM.00081-16
- 679 52. Martins, M. *et al.* Evidence of Metabolic Switching and Implications for Food Safety from  
680 the Phenome(s) of Salmonella enterica Serovar Typhimurium DT104 Cultured at Selected  
681 Points across the Pork Production Food Chain. *Appl. Environ. Microbiol.* **79**, 5437–5449  
682 (2013).
- 683 53. Hernández, S. B., Cota, I., Ducret, A., Aussel, L. & Casadesús, J. Adaptation and  
684 Preadaptation of Salmonella enterica to Bile. *PLoS Genet* **8**, e1002459 (2012).
- 685 54. Drecktrah, D., Knodler, L. A., Ireland, R. & Steele-Mortimer, O. The mechanism of  
686 Salmonella entry determines the vacuolar environment and intracellular gene expression.  
687 *Traffic Cph. Den.* **7**, 39–51 (2006).

688 55. Toro, M. *et al.* Draft Genome Sequences of 33 *Salmonella enterica* Clinical and Wildlife  
689 Isolates from Chile. *Genome Announc.* **3**, e00054-15 (2015).

690 56. Hoffmann, M. *et al.* First Fully Closed Genome Sequence of *Salmonella enterica* subsp.  
691 *enterica* Serovar Cubana Associated with a Food-Borne Outbreak. *Genome Announc.* **2**,  
692 e01112-14 (2014).

693 57. Pirone-Davies, C. *et al.* Genome-Wide Methylation Patterns in *Salmonella enterica*  
694 Subsp. *enterica* Serovars. *PLoS ONE* **10**, e0123639 (2015).

695 58. Simon, A. *FastQC: A quality control tool for high throughput sequence data.* (2010).

696 59. Marçais, G. & Kingsford, C. A fast, lock-free approach for efficient parallel counting of  
697 occurrences of k-mers. *Bioinformatics* **27**, 764–770 (2011).

698 60. Li, H. BFC: correcting Illumina sequencing errors. *Bioinformatics* **31**, 2885–2887 (2015).

699 61. Bankevich, A. *et al.* SPAdes: A New Genome Assembly Algorithm and Its Applications  
700 to Single-Cell Sequencing. *J. Comput. Biol.* **19**, 455–477 (2012).

701 62. Bolger, A. M., Lohse, M. & Usadel, B. Trimmomatic: a flexible trimmer for Illumina  
702 sequence data. *Bioinformatics* **30**, 2114–2120 (2014).

703 63. Gurevich, A., Saveliev, V., Vyahhi, N. & Tesler, G. QUAST: quality assessment tool for  
704 genome assemblies. *Bioinformatics* **29**, 1072–1075 (2013).

705 64. Wick, R. R., Schultz, M. B., Zobel, J. & Holt, K. E. Bandage: interactive visualization of  
706 de novo genome assemblies. *Bioinformatics* **31**, 3350–3352 (2015).

707 65. Krumsiek, J., Arnold, R. & Rattei, T. Gepard: a rapid and sensitive tool for creating  
708 dotplots on genome scale. *Bioinformatics* **23**, 1026–1028 (2007).

709 66. Chin, C.-S. *et al.* Nonhybrid, finished microbial genome assemblies from long-read  
710 SMRT sequencing data. *Nat. Methods* **10**, 563–569 (2013).

711 67. Klimke, W. *et al.* The National Center for Biotechnology Information's Protein Clusters  
712 Database. *Nucleic Acids Res.* **37**, D216–D223 (2009).

713 68. Altschul, S. F., Gish, W., Miller, W., Myers, E. W. & Lipman, D. J. Basic local alignment  
714 search tool. *J. Mol. Biol.* **215**, 403–410 (1990).

715 69. Camacho, C. *et al.* BLAST+: architecture and applications. *BMC Bioinformatics* **10**, 421  
716 (2009).

717 70. Cock, P. J. A. *et al.* Biopython: freely available Python tools for computational molecular  
718 biology and bioinformatics. *Bioinformatics* **25**, 1422–1423 (2009).

719 71. Rice, P., Longden, I. & Bleasby, A. EMBOSS: The European Molecular Biology Open  
720 Software Suite. *Trends Genet.* **16**, 276–277 (2000).

721 72. Laslett, D. & Canback, B. ARAGORN, a program to detect tRNA genes and tmRNA  
722 genes in nucleotide sequences. *Nucleic Acids Res.* **32**, 11–16 (2004).

723 73. Hyatt, D. *et al.* Prodigal: prokaryotic gene recognition and translation initiation site  
724 identification. *BMC Bioinformatics* **11**, 119 (2010).

725 74. Finn, R. D., Clements, J. & Eddy, S. R. HMMER web server: interactive sequence  
726 similarity searching. *Nucleic Acids Res.* **39**, W29–W37 (2011).

727 75. Petersen, T. N., Brunak, S., von Heijne, G. & Nielsen, H. SignalP 4.0: discriminating  
728 signal peptides from transmembrane regions. *Nat. Methods* **8**, 785–786 (2011).

729 76. Nawrocki, E. P. & Eddy, S. R. Infernal 1.1: 100-fold faster RNA homology searches.  
730 *Bioinformatics* **29**, 2933–2935 (2013).

731 77. Seemann, T. Prokka: rapid prokaryotic genome annotation. *Bioinformatics* **30**, 2068–  
732 2069 (2014).

733 78. tseemann/barnnap. *GitHub* Available at: <https://github.com/tseemann/barnnap>.

734 79. ctSkennerton/minced. *GitHub* Available at: <https://github.com/ctSkennerton/minced>.

735 80. Enright, A. J., Dongen, S. V. & Ouzounis, C. A. An efficient algorithm for large-scale  
736 detection of protein families. *Nucleic Acids Res.* **30**, 1575–1584 (2002).

737 81. Li, W. & Godzik, A. Cd-hit: a fast program for clustering and comparing large sets of  
738 protein or nucleotide sequences. *Bioinformatics* **22**, 1658–1659 (2006).

739 82. Quinlan, A. R. & Hall, I. M. BEDTools: a flexible suite of utilities for comparing genomic  
740 features. *Bioinformatics* **26**, 841–842 (2010).

741 83. Page, A. J. *et al.* Roary: rapid large-scale prokaryote pan genome analysis.  
742 *Bioinformatics* **31**, 3691–3693 (2015).

743 84. Price, M. N., Dehal, P. S. & Arkin, A. P. FastTree 2 – Approximately Maximum-  
744 Likelihood Trees for Large Alignments. *PLOS ONE* **5**, e9490 (2010).

745 85. Eren, A. M. *et al.* Anvi'o: an advanced analysis and visualization platform for 'omics  
746 data. *PeerJ* **3**, e1319 (2015).

747 86. Wickham, H. *ggplot2: Elegant Graphics for Data Analysis*. (Springer-Verlag New York,  
748 2009).

749 87. R Core Team. *R: A Language and Environment for Statistical Computing*. (R  
750 Foundation for Statistical Computing, 2016).

751 88. danieljhurley/atypical-salmonella. *GitHub* Available at:  
752 <https://github.com/danieljhurley/atypical-salmonella>.

753 **Acknowledgements**

754

755 Daniel Hurley is supported by the Wellcome Trust Computational Infection Biology PhD

756 Programme (Grant reference: 099837/Z/12/Z).

757 **Author information**

758

759 **Contributions**

760

761 D.H. and M.M. designed experiments. D.H. and M.H. performed experiments and analysed  
 762 data. T.M. performed experiments. D.H. and S.F. wrote the manuscript. All authors discussed  
 763 the results and contributed to the revision of the manuscript.

764

765 **Competing interests**

766

767 The authors declare no competing financial interests.

768 **Tables**

| <b>S. enterica serovar</b> | <b>Strain</b> | <b>Outbreak</b>         | <b>Location</b>    | <b>Year</b> | <b>Isolation Source</b> |
|----------------------------|---------------|-------------------------|--------------------|-------------|-------------------------|
| Anatum                     | CFSAN003959   | Papaya                  | Mexico             | 2012        | Papaya                  |
| Bareilly                   | CFSAN001111   | Tuna                    | India              | 2012        | Tuna scrape, frozen     |
| Cubana                     | CFSAN002050   | Alfalfa sprouts         | USA - Arizona      | 2012        | Alfalfa sprouts         |
| Heidelberg                 | CFSAN002063   | Chicken                 | USA - Washington   | 2012        | Clinical                |
| Javiana                    | CFSAN000905   | Green onion             | Mexico             | 2009        | Canal water             |
| Montevideo                 | CFSAN000264   | Black pepper            | USA - Rhode Island | 2010        | Black pepper            |
| Newport                    | CFSAN003345   | Eastern shore sampling  | USA - Virginia     | 2011        | Goose faeces            |
| Saintpaul                  | CFSAN004090   | Jalapeño/serrano pepper | Mexico             | 2008        | Jalapeño pepper         |
| Tennessee                  | CFSAN001387   | Peanut butter           | USA - Georgia      | 2007        | Peanut butter           |
| <b>Typhimurium</b>         | <b>14028S</b> |                         |                    |             |                         |
| <b>Typhimurium</b>         | <b>ST4/74</b> |                         |                    |             |                         |
| Weltevreden                | CFSAN001415   | Prison tuna             | USA - Virginia     | 2005        | Tuna                    |

769

770 **Table 1** <https://figshare.com/s/fb95302c728bc440f7b7>





782 and ST4/74 correspond to the mean of six independent assays ( $n = 6$ ) with duplicate technical  
783 replicates. **C)** Survival of *S. Tennessee* CFSAN001387 in comparison with *S. Typhimurium*  
784 ST4/74 following phagocytosis by THP-1 macrophages at 2, 4, 8, 24, 48, 72, 96, 120, 144 and  
785 168 HPI reported as  $\text{Log}_{10}$  CFU/mL. **D)** Survival of *S. Tennessee* CFSAN001387 in  
786 comparison with *S. Typhimurium* ST4/74 following phagocytosis by THP-1 macrophages at 4,  
787 8, 24, 48, 72, 96, 120, 144 and 168 HPI reported as  $\text{Log}_2$  fold change comparing to 2 HPI.  
788 Results correspond to the mean of three independent assays ( $n = 3$ ) with triplicate technical  
789 replicates. The lower and upper hinges correspond to the 25th and 75th percentiles with the  
790 whiskers extending  $\pm 1.5$  times the range between first and third quartiles.  
791 <https://figshare.com/s/fb95302c728bc440f7b7>

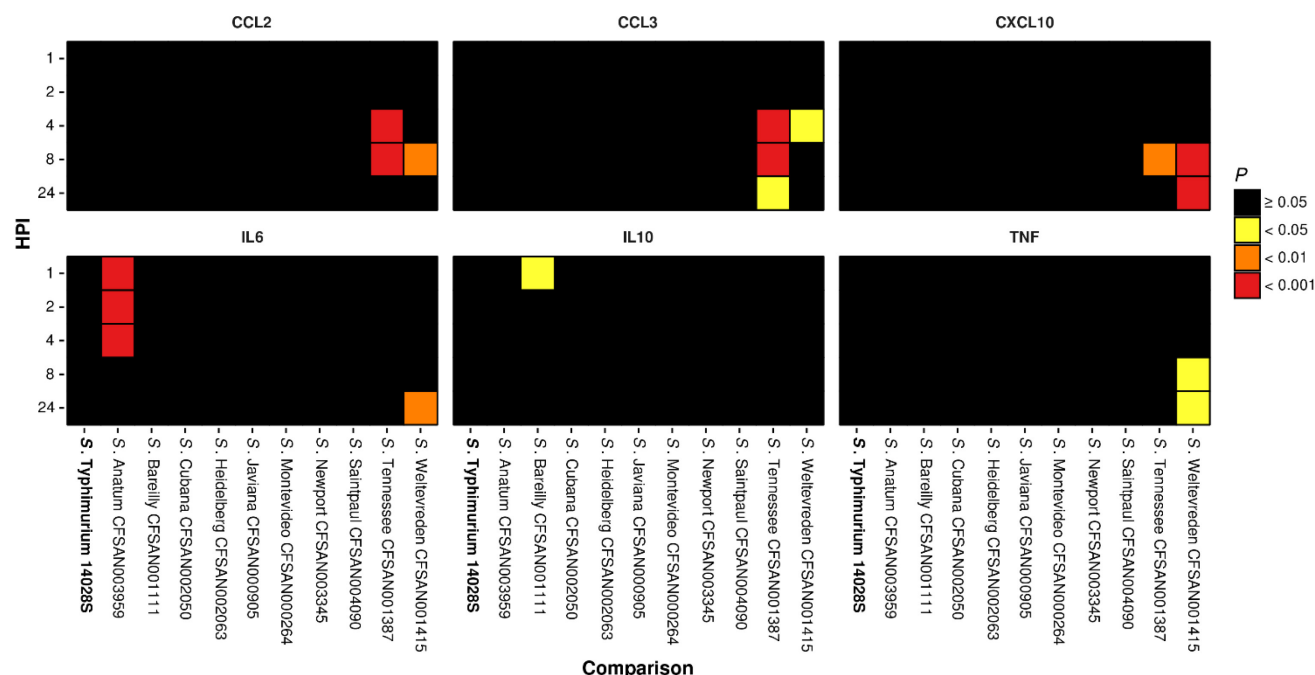

**Fig. 2: Significant RAW 264.7 chemokine and proinflammatory cytokine release following infection with isolates when compared to *S. Typhimurium* ST4/74 infection**

Increased release of chemokine and proinflammatory cytokine proteins by RAW 264.7 macrophages at 1, 2, 4, 8 and 24 HPI with isolates when compared to *S. Typhimurium* ST4/74 as determined by one-way ANOVA. Values correspond to adjusted probability (*P*) as determined by *post hoc* analysis of significance using Tukey's range test. Differences were deemed significant by arbitrary cut-offs at  $< 0.05$ ,  $< 0.01$  and  $< 0.001$ .

<https://figshare.com/s/fb95302c728bc440f7b7>

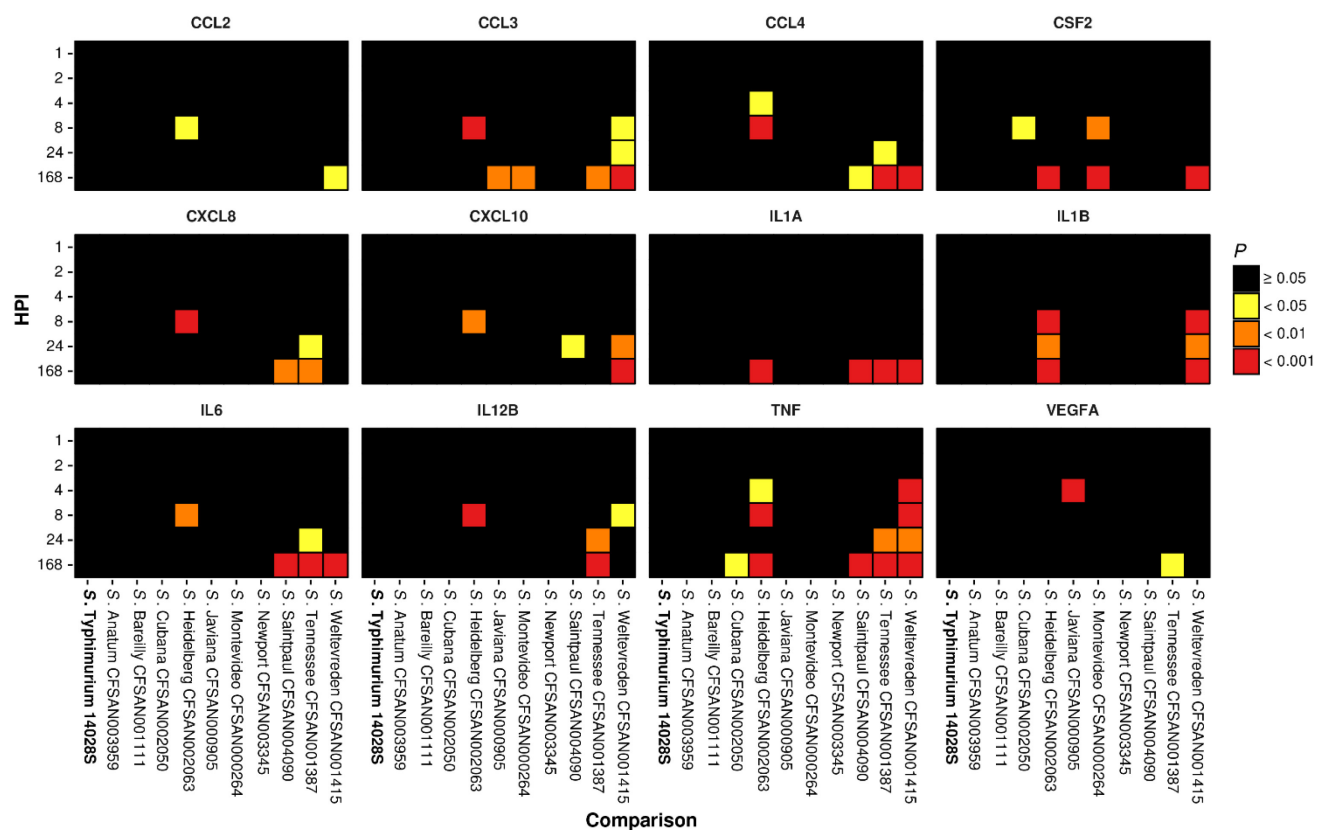

**Fig. 3: Significant THP-1 chemokine, cytokine and proinflammatory cytokine release following infection with isolates when compared to *S. Typhimurium* ST4/74 infection**

Increased release of chemokine, cytokine and proinflammatory cytokine proteins by THP-1 macrophages at 1, 2, 4, 8, 24 and 168 HPI with isolates when compared to *S. Typhimurium* ST4/74 as determined by one-way ANOVA. Values correspond to adjusted probability ( $P$ ) as determined by *post hoc* analysis of significance using Tukey's range test. Differences were deemed significant by arbitrary cut-offs at  $< 0.05$ ,  $0.01$  and  $0.001$ .

<https://figshare.com/s/fb95302c728bc440f7b7>



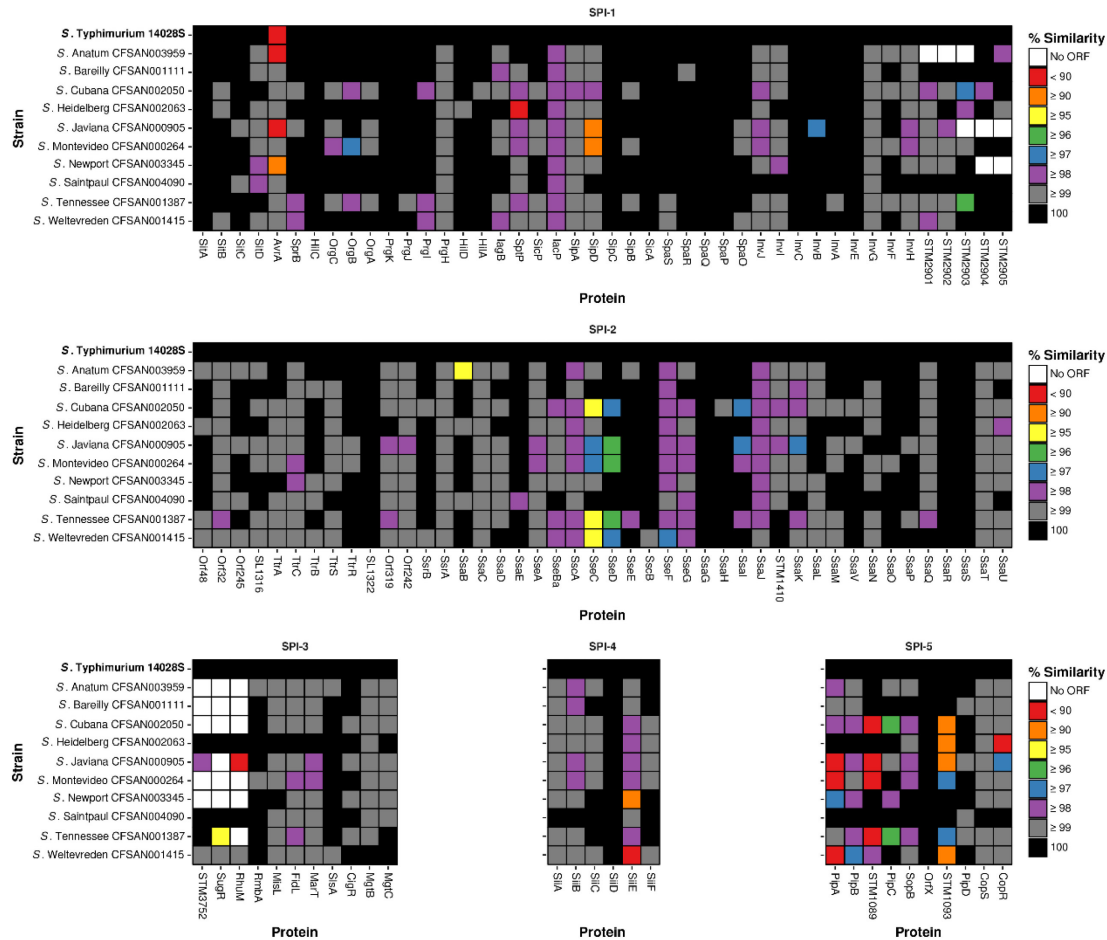

**Fig. 5: Sequence variability within SPI-1 to SPI-5**

The amino acid sequence similarity for SPI gene content of each isolate included in this study was compared with *S. Typhimurium* ST4/74.

<https://figshare.com/s/fb95302c728bc440f7b7>
